# Supplementary material for: What do maternity services produce? An exploration of potential output measures to assess the efficiency and productivity of maternity services in Australia.
Source: Research Square preprint supplement (doi:10.21203/rs.3.rs-114705/v1), 2020-12-01
Supplement: Supplementary file 1 [file 8ce4e4e85bfa871e201a6ee8.docx]

**What do maternity services produce? An exploration of potential output measures to assess the efficiency and productivity of maternity services in Australia.**

Bonnie Eklom1, Emily Callander2, Sally Tracy3

1College of Public Health, Medical and Veterinary Science, James Cook University, Townsville, Queensland, Australia

2School of Public Health and Preventative Medicine, Monash University, Melbourne, Australia and the College of Public Health, Medical and Veterinary Sciences, James Cook University, Townsville, Australia. E: emily.callander@monash.edu

3The Molly Wardaguga Research Centre, Charles Darwin University, Darwin, NT, and The University of Sydney, 88 Mallett Street, Camperdown, NSW, 2050, Australia. E: sally.tracy@sydney.edu.au

*Corresponding Author:*

Bonnie Eklom

1 James Cook Drive

James Cook University

Townsville, Queensland, Australia, 4811

+61 7 4781 5036

[bonnie.eklom@my.jcu.edu.au](mailto:bonnie.eklom@my.jcu.edu.au)

*Additional File 1: The twelve principles for woman-centred care as outlined in the Australian national strategy Woman-centred care: Strategic Directions for Australian Maternity Services*

| **The Twelve Principles for Woman-centred Maternity Care** 12 |
| --- |
| Women receive individualised information and appropriate care during the perinatal period that is based on current, high quality evidence. |
| Women have access to individualised culturally safe and responsive maternity care, in their preferred language. |
| Women access care from a maternity care workforce that is responsive, competent, resourced and reflects cultural diversity. |
| Women are treated with dignity and respect throughout maternity care. |
| Maternity care is holistic, encompassing a woman’s physical, emotional, psychosocial, spiritual and cultural needs. |
| Women’s safety and experience of maternity care is underpinned by respectful communication and collaboration among health professionals. |
| Women are provided with and can readily access information about all locally available maternity services. |
| Women are supported to make informed decisions and choices about their care. |
| Women’s choices and preferences are sought and respected throughout maternity care. |
| Women have access to appropriate maternity care where they choose from conception until 12 months after birth. |
| Women have access to continuity of care with the care provider(s) of their choice — including midwifery continuity of care. |
| Women have access to mental health information, assessment, support and treatment from conception until 12 months after birth |
